# Supplementary material for: Integrated analysis of genome-wide DNA methylation and gene expression profiles identifies potential novel biomarkers of rectal cancer
Source: PubMed Central journal article supplement (PMC5308745; doi:10.18632/oncotarget.11534), 2016-08-23
Supplement: oncotarget-07-62547-s001.pdf [file oncotarget-07-62547-s001.pdf]

# Integrated analysis of genome-wide DNA methylation and gene expression profiles identifies potential novel biomarkers of rectal cancer

## SUPPLEMENTARY FIGURES AND TABLES

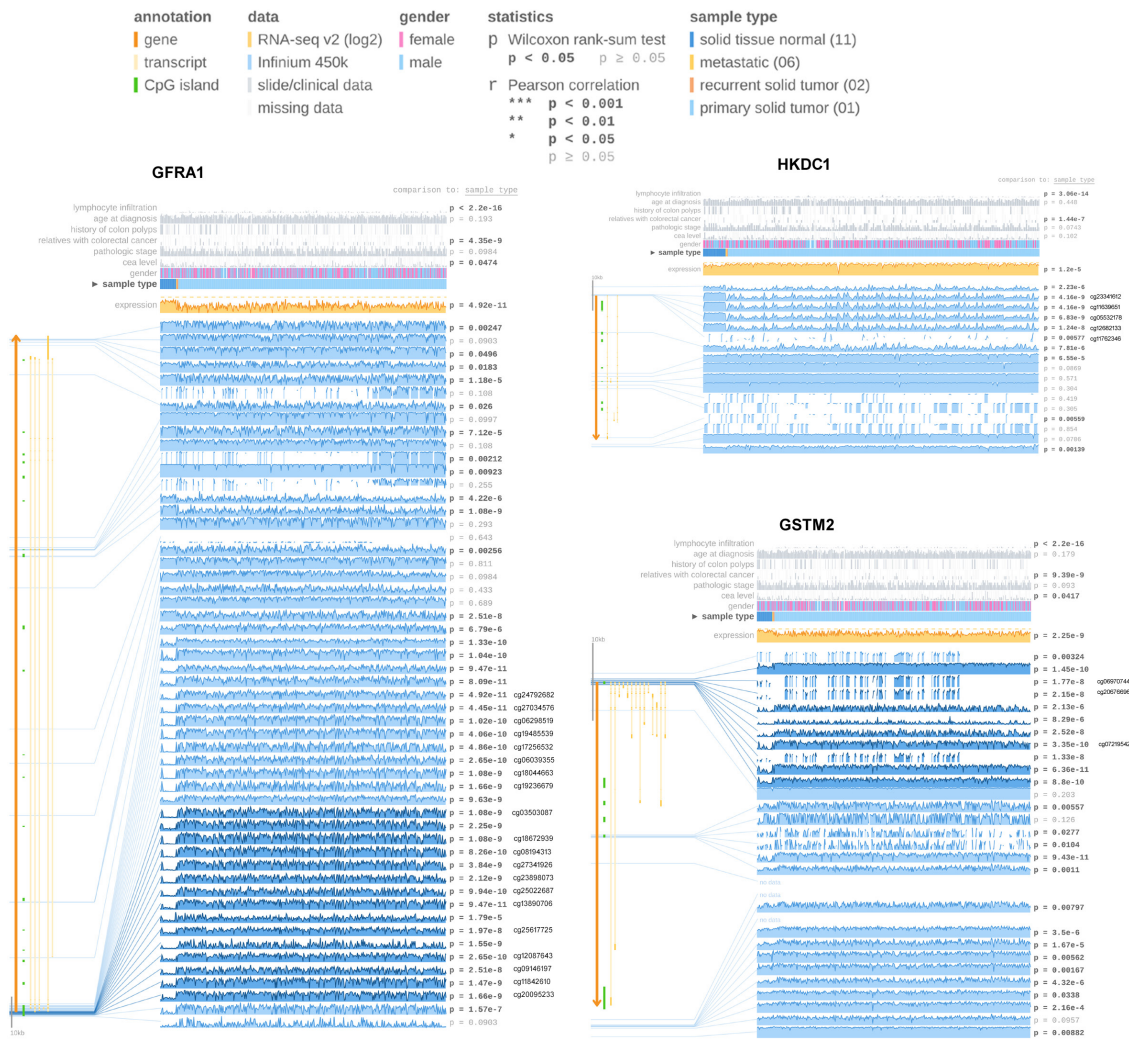

**Supplementary Figure S1: Visualization of the TCGA data for three genes in colorectal adenocarcinoma using MEXPRESS.** The samples are ordered by sample type, revealing clear differences in expression and methylation. The CpG ids with different methylation level screened in this study are marked behind.

**A**

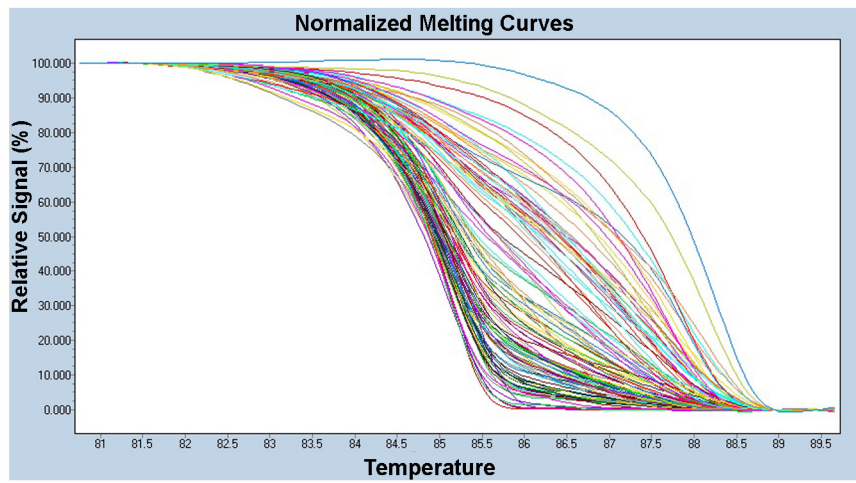

**GSTM2**

**B**

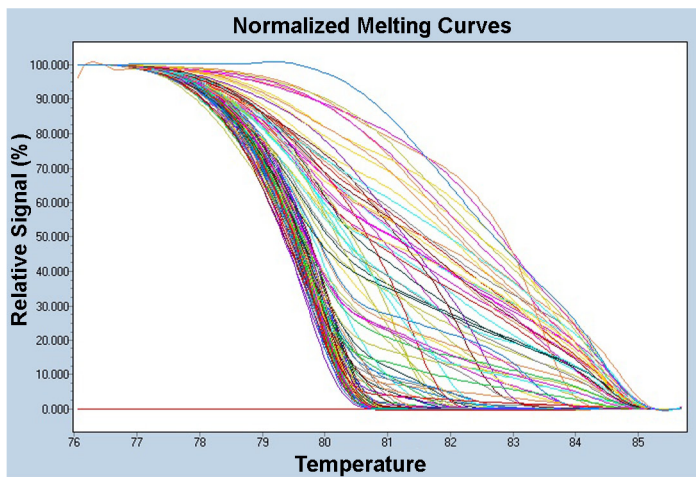

**GFRA1**

**Supplementary Figure S2: Normalized MS-HRM standard curves and different plots of three aimed genes. Methylation levels of *GSTM2*, and *GFRA1* were determined using MS-HRM.**

**Supplementary Table S1: The CpG identity and average methylation level of the 36 genes**

See Supplementary File S1.

**Supplementary Table S2: The Diagnostic performance of selected gene methylation**

| <b>Gene</b>  | <b>AUC</b>   | <b>95%CI</b>        | <b>Sensitivity (%)</b> | <b>Specificity (%)</b> | <b>Cutoff(<math>\beta</math>-value)</b> |
|--------------|--------------|---------------------|------------------------|------------------------|-----------------------------------------|
| <b>GFRA1</b> | <b>0.949</b> | <b>0.888- 0.982</b> | <b>89.06</b>           | <b>97.56</b>           | <b>0.160</b>                            |
| <b>GSTM2</b> | <b>0.926</b> | <b>0.858- 0.968</b> | <b>82.81</b>           | <b>95.12</b>           | <b>0.421</b>                            |
| <b>SEPT9</b> | <b>0.877</b> | <b>0.798- 0.933</b> | <b>71.87</b>           | <b>97.56</b>           | <b>0.085</b>                            |

AUC: area under ROC curve, CI: confidence interval.

Supplementary Table S3: Primer list

| <b>name</b> | <b>sequence</b>              | <b>product size</b> |
|-------------|------------------------------|---------------------|
| MH-GSTM2-F  | ATGTTTATGATATTGGGGTATTGGA    | 228bp               |
| MH-GSTM2-R  | TCCTCCTCTCGTTCCTACCTCA       |                     |
| MH-GFRA1-F  | AGTTTAAGGGGGTGTGTTGGGT       | 332bp               |
| MH-GFRA1-R  | CATCGATTCCCCCTAACTTAACGACCTC |                     |
| GSTM2-F     | GAGAAACCAAGTATTTGAGCCCAG     | 128bp               |
| GSTM2-R     | CAGGTCTTGGGAGGAAGCG          |                     |
| GFRA1-F     | GATATATTCCGGGTGGTCCCATTC     | 150bp               |
| GFRA1-R     | GGTGCACGGGGTGATGTACGC        |                     |
